# Supplementary material
Source: ML conference proceedings conference paper supplement (https://proceedings.neurips.cc/paper_files/paper/2022/hash/2938ad0434a6506b125d8adaff084a4a-Abstract.html)
Supplement: Supplementary file 1 [file 2938ad0434a6506b125d8adaff084a4a-Supplemental-Conference.zip]

Archive with 103 entries (88 files):
- disentangling_transfer/
- disentangling_transfer/code/
- disentangling_transfer/code/mrunner_run.py
- disentangling_transfer/code/mrunner_exps/
- disentangling_transfer/code/mrunner_exps/check_if_identical.py
- disentangling_transfer/code/mrunner_exps/neurips22/
- disentangling_transfer/code/mrunner_exps/neurips22/matrix_transfer_single_component.py
- disentangling_transfer/code/mrunner_exps/neurips22/methods_hp_search.py
- disentangling_transfer/code/mrunner_exps/neurips22/matrix_transfer_freezing.py
- disentangling_transfer/code/mrunner_exps/neurips22/base_hp_search.py
- disentangling_transfer/code/mrunner_exps/neurips22/matrix_transfer_experience.py
- disentangling_transfer/code/mrunner_exps/neurips22/exploration_comparison.py
- disentangling_transfer/code/mrunner_exps/neurips22/er_tune_clipnorm.py
- disentangling_transfer/code/mrunner_exps/testing_new_neptune.py
- disentangling_transfer/code/mrunner_exps/paper_single_exps.py
- disentangling_transfer/code/mrunner_exps/example_small.py
- disentangling_transfer/code/mrunner_exps/.DS_Store
- disentangling_transfer/code/mrunner_exps/paper_cl_exps.py
- disentangling_transfer/code/mrunner_exps/paper_mt_exps.py
- disentangling_transfer/code/run_single.py
- disentangling_transfer/code/README.md
- disentangling_transfer/code/.DS_Store
- disentangling_transfer/code/run_cl.py
- disentangling_transfer/code/continualworld/
- disentangling_transfer/code/continualworld/envs.py
- disentangling_transfer/code/continualworld/__pycache__/
- disentangling_transfer/code/continualworld/__pycache__/vpg.cpython-38.pyc
- disentangling_transfer/code/continualworld/__pycache__/ars.cpython-38.pyc
- disentangling_transfer/code/continualworld/__pycache__/vpg_core.cpython-38.pyc
- disentangling_transfer/code/continualworld/__pycache__/__init__.cpython-38.pyc
- disentangling_transfer/code/continualworld/__pycache__/tasks.cpython-37.pyc
- disentangling_transfer/code/continualworld/__pycache__/envs.cpython-38.pyc
- disentangling_transfer/code/continualworld/__pycache__/tasks.cpython-38.pyc
- disentangling_transfer/code/continualworld/__pycache__/__init__.cpython-37.pyc
- disentangling_transfer/code/continualworld/__init__.py
- disentangling_transfer/code/continualworld/utils/
- disentangling_transfer/code/continualworld/utils/__pycache__/
- disentangling_transfer/code/continualworld/utils/__pycache__/run_utils.cpython-38.pyc
- disentangling_transfer/code/continualworld/utils/__pycache__/enums.cpython-37.pyc
- disentangling_transfer/code/continualworld/utils/__pycache__/enums.cpython-38.pyc
- disentangling_transfer/code/continualworld/utils/__pycache__/__init__.cpython-38.pyc
- disentangling_transfer/code/continualworld/utils/__pycache__/wrappers.cpython-38.pyc
- disentangling_transfer/code/continualworld/utils/__pycache__/utils.cpython-38.pyc
- disentangling_transfer/code/continualworld/utils/__pycache__/utils.cpython-37.pyc
- disentangling_transfer/code/continualworld/utils/__pycache__/__init__.cpython-37.pyc
- disentangling_transfer/code/continualworld/utils/run_utils.py
- disentangling_transfer/code/continualworld/utils/__init__.py
- disentangling_transfer/code/continualworld/utils/utils.py
- disentangling_transfer/code/continualworld/utils/enums.py
- disentangling_transfer/code/continualworld/utils/wrappers.py
- disentangling_transfer/code/continualworld/methods/
- disentangling_transfer/code/continualworld/methods/__pycache__/
- disentangling_transfer/code/continualworld/methods/__pycache__/regularization.cpython-38.pyc
- disentangling_transfer/code/continualworld/methods/__pycache__/packnet.cpython-38.pyc
- disentangling_transfer/code/continualworld/methods/__pycache__/ewc.cpython-38.pyc
- disentangling_transfer/code/continualworld/methods/__pycache__/agem.cpython-38.pyc
- disentangling_transfer/code/continualworld/methods/__pycache__/l2.cpython-38.pyc
- disentangling_transfer/code/continualworld/methods/__pycache__/__init__.cpython-38.pyc
- disentangling_transfer/code/continualworld/methods/__pycache__/vcl.cpython-38.pyc
- disentangling_transfer/code/continualworld/methods/__pycache__/mas.cpython-38.pyc
- disentangling_transfer/code/continualworld/methods/__pycache__/episodic_replay.cpython-38.pyc
- disentangling_transfer/code/continualworld/methods/agem.py
- disentangling_transfer/code/continualworld/methods/__init__.py
- disentangling_transfer/code/continualworld/methods/mas.py
- disentangling_transfer/code/continualworld/methods/l2.py
- disentangling_transfer/code/continualworld/methods/ewc.py
- disentangling_transfer/code/continualworld/methods/regularization.py
- disentangling_transfer/code/continualworld/methods/vcl.py
- disentangling_transfer/code/continualworld/methods/episodic_replay.py
- disentangling_transfer/code/continualworld/methods/packnet.py
- disentangling_transfer/code/continualworld/results_processing/
- disentangling_transfer/code/continualworld/results_processing/__init__.py
- disentangling_transfer/code/continualworld/results_processing/plots.py
- disentangling_transfer/code/continualworld/results_processing/tables.py
- disentangling_transfer/code/continualworld/results_processing/utils.py
- disentangling_transfer/code/continualworld/tasks.py
- disentangling_transfer/code/continualworld/sac/
- disentangling_transfer/code/continualworld/sac/__pycache__/
- disentangling_transfer/code/continualworld/sac/__pycache__/exploration.cpython-38.pyc
- disentangling_transfer/code/continualworld/sac/__pycache__/__init__.cpython-38.pyc
- disentangling_transfer/code/continualworld/sac/__pycache__/replay_buffers.cpython-38.pyc
- disentangling_transfer/code/continualworld/sac/__pycache__/sac.cpython-38.pyc
- disentangling_transfer/code/continualworld/sac/__pycache__/models.cpython-38.pyc
- disentangling_transfer/code/continualworld/sac/__init__.py
- disentangling_transfer/code/continualworld/sac/utils/
- disentangling_transfer/code/continualworld/sac/utils/__pycache__/
- disentangling_transfer/code/continualworld/sac/utils/__pycache__/__init__.cpython-38.pyc
- disentangling_transfer/code/continualworld/sac/utils/__pycache__/serialization_utils.cpython-38.pyc
- disentangling_transfer/code/continualworld/sac/utils/__pycache__/logx.cpython-38.pyc
- disentangling_transfer/code/continualworld/sac/utils/__init__.py
- disentangling_transfer/code/continualworld/sac/utils/logx.py
- disentangling_transfer/code/continualworld/sac/utils/serialization_utils.py
- disentangling_transfer/code/continualworld/sac/sac.py
- disentangling_transfer/code/continualworld/sac/exploration.py
- disentangling_transfer/code/continualworld/sac/replay_buffers.py
- disentangling_transfer/code/continualworld/sac/models.py
- disentangling_transfer/code/setup.py
- disentangling_transfer/code/produce_results.py
- disentangling_transfer/code/input_args.py
- disentangling_transfer/code/mrunner_utils.py
- disentangling_transfer/code/nb_produce_results.ipynb
- disentangling_transfer/code/run_mt.py
- disentangling_transfer/appendix.pdf
