# Supplementary material
Source: ML conference proceedings conference paper supplement (https://proceedings.neurips.cc/paper_files/paper/2022/hash/2938ad0434a6506b125d8adaff084a4a-Abstract.html)
Supplement: Supplementary file 1 [file 2938ad0434a6506b125d8adaff084a4a-Supplemental-Conference.zip › disentangling_transfer/code/continualworld/methods/vcl.py]

from typing import Callable, Iterable, List, Tuple

import gym
import tensorflow as tf
import tensorflow.keras as tfk
from tensorflow.keras import Input, Model

from continualworld.envs import MW_OBS_LEN
from continualworld.sac.models import _choose_head, apply_squashing_func, gaussian_likelihood
from continualworld.sac.sac import SAC

EPS = 1e-8

LOG_STD_MAX = 2
LOG_STD_MIN = -20


class VCL_SAC(SAC):
    def __init__(
        self,
        cl_reg_coef: float = 0.0,
        regularize_critic: bool = False,
        first_task_kl: bool = True,
        **vanilla_sac_kwargs
    ) -> None:
        """Variational Continual Learning method. See https://arxiv.org/abs/1710.10628 .

        Args:
          cl_reg_coef: Regularization strength for continual learning methods.
            Valid for 'l2', 'ewc', 'mas' continual learning methods.
          regularize_critic: If True, both actor and critic are regularized; if False, only actor
            is regularized.
          first_task_kl: If True, use KL regularization also for the first task in 'vcl'
            continual learning method.
        """
        assert regularize_critic is False, "VCL critic reg not supported"

        super().__init__(**vanilla_sac_kwargs)
        self.cl_reg_coef = cl_reg_coef
        self.regularize_critic = regularize_critic
        self.first_task_kl = first_task_kl
        self.reg_layers = (
            self.actor.core.layers + self.actor.head_mu.layers + self.actor.head_log_std.layers
        )

    def get_auxiliary_loss(self, seq_idx: tf.Tensor) -> tf.Tensor:
        aux_loss = self._regularize(seq_idx, regularize_last_layer=self.first_task_kl)
        aux_loss_coef = tf.cond(
            seq_idx > 0 or self.first_task_kl, lambda: self.cl_reg_coef, lambda: 0.0
        )
        aux_loss *= aux_loss_coef

        return aux_loss

    def on_task_start(self, current_task_idx: int) -> None:
        if current_task_idx > 0:
            self._update_model_prior()

    def _update_model_prior(self) -> None:
        """Update the prior distribution of parameters for the whole network."""

        for layer in self.reg_layers:
            if isinstance(layer, BayesianDense):
                self._update_layer_prior(layer)
            if isinstance(layer, tf.keras.layers.LayerNormalization):
                layer.trainable = False

    @staticmethod
    def _update_layer_prior(layer: tfk.layers.Layer) -> None:
        """Update the prior distribution of parameters in the passed layer."""

        if isinstance(layer, BayesianDense) and layer.num_heads == 1:
            layer.prior_w_mean.assign(layer.posterior_w_mean)
            layer.prior_w_logvar.assign(layer.posterior_w_logvar)

            layer.prior_b_mean.assign(layer.posterior_b_mean)
            layer.prior_b_logvar.assign(layer.posterior_b_logvar)

    def _regularize(self, seq_idx: int, regularize_last_layer: bool) -> tf.Tensor:
        """Calculate the KL loss regularizing the distribution of the parameters for current task
        to stay close to the distribution of parameters for the previous tasks."""

        kl_loss = 0.0
        for layer in self.reg_layers:
            if isinstance(layer, BayesianDense):
                if layer.num_heads > 1:  # Last layer
                    if not regularize_last_layer:
                        continue
                    input_dim = tf.shape(layer.posterior_w_mean)[0]
                    new_shape = (input_dim, -1, layer.num_heads)
                    kl_loss += kl_divergence(
                        tf.reshape(layer.posterior_w_mean, new_shape)[:, :, seq_idx],
                        tf.reshape(layer.posterior_w_logvar, new_shape)[:, :, seq_idx],
                        tf.reshape(layer.prior_w_mean, new_shape)[:, :, seq_idx],
                        tf.reshape(layer.prior_w_logvar, new_shape)[:, :, seq_idx],
                    )
                    kl_loss += kl_divergence(
                        tf.reshape(layer.posterior_b_mean, (-1, layer.num_heads))[:, seq_idx],
                        tf.reshape(layer.posterior_b_logvar, (-1, layer.num_heads))[:, seq_idx],
                        tf.reshape(layer.prior_b_mean, (-1, layer.num_heads))[:, seq_idx],
                        tf.reshape(layer.prior_b_logvar, (-1, layer.num_heads))[:, seq_idx],
                    )
                else:
                    kl_loss += kl_divergence(
                        layer.posterior_w_mean,
                        layer.posterior_w_logvar,
                        layer.prior_w_mean,
                        layer.prior_w_logvar,
                    )
                    kl_loss += kl_divergence(
                        layer.posterior_b_mean,
                        layer.posterior_b_logvar,
                        layer.prior_b_mean,
                        layer.prior_b_logvar,
                    )

        return kl_loss


class BayesianDense(tfk.layers.Layer):
    """Bayesian network implementation of dense (linear) layers. We encode each parameter in the
    layer as a normal distribution."""

    def __init__(
        self,
        input_dim: int,
        output_dim: int,
        activation: Callable = None,
        enable_kl: bool = True,
        num_heads: int = 1,
    ) -> None:
        super().__init__()

        logvar_init = tf.constant_initializer(-6.0)
        w_init = tfk.initializers.GlorotUniform()
        b_init = tf.zeros_initializer()

        self.input_dim = input_dim
        self.output_dim = output_dim
        self.num_heads = num_heads

        self.posterior_w_mean = tf.Variable(
            initial_value=w_init(shape=(input_dim, output_dim), dtype="float32"),
            trainable=True,
        )
        self.posterior_w_logvar = tf.Variable(
            initial_value=logvar_init(shape=(input_dim, output_dim), dtype="float32"),
            trainable=True,
        )

        self.posterior_b_mean = tf.Variable(
            initial_value=b_init(shape=(output_dim,), dtype="float32"), trainable=True
        )
        self.posterior_b_logvar = tf.Variable(
            initial_value=logvar_init(shape=(output_dim,), dtype="float32"), trainable=True
        )

        self.prior_w_mean = tf.Variable(tf.zeros_like(self.posterior_w_mean), trainable=False)
        self.prior_w_logvar = tf.Variable(tf.zeros_like(self.posterior_w_logvar), trainable=False)

        self.prior_b_mean = tf.Variable(tf.zeros_like(self.posterior_b_mean), trainable=False)
        self.prior_b_logvar = tf.Variable(tf.zeros_like(self.posterior_b_logvar), trainable=False)

        self.activation = activation
        self.enable_kl = enable_kl

    def call(self, inputs: tf.Tensor) -> tf.Tensor:
        eps_w = tf.random.normal((self.input_dim, self.output_dim), 0, 1, dtype=tf.float32)
        eps_b = tf.random.normal((1, self.output_dim), 0, 1, dtype=tf.float32)

        weights = eps_w * tf.exp(0.5 * self.posterior_w_logvar) + self.posterior_w_mean
        biases = eps_b * tf.exp(0.5 * self.posterior_b_logvar) + self.posterior_b_mean
        output = tf.matmul(inputs, weights) + biases

        if self.activation is not None:
            output = self.activation(output)

        return output


def variational_mlp(
    input_dim: int,
    hidden_sizes: Iterable[int],
    activation: Callable,
    use_layer_norm: bool = False,
) -> tfk.Model:
    model = tf.keras.Sequential()
    model.add(Input(shape=(input_dim,)))
    model.add(BayesianDense(input_dim, hidden_sizes[0]))
    if use_layer_norm:
        model.add(tf.keras.layers.LayerNormalization())
        model.add(tf.keras.layers.Activation(tf.nn.tanh))
    else:
        model.add(tf.keras.layers.Activation(activation))
    for layer_idx in range(1, len(hidden_sizes)):
        prev_size, next_size = hidden_sizes[layer_idx - 1], hidden_sizes[layer_idx]
        model.add(BayesianDense(prev_size, next_size, activation=activation))
    return model


class VclMlpActor(Model):
    def __init__(
        self,
        input_dim: int,
        action_space: gym.Space,
        hidden_sizes: Iterable[int] = (256, 256),
        activation: Callable = tf.tanh,
        use_layer_norm: bool = False,
        num_heads: int = 1,
        hide_task_id: bool = False,
    ) -> None:
        super(VclMlpActor, self).__init__()

        self.num_heads = num_heads
        self.hide_task_id = hide_task_id

        if self.hide_task_id:
            input_dim = MW_OBS_LEN

        self.core = variational_mlp(
            input_dim,
            hidden_sizes,
            activation,
            use_layer_norm=use_layer_norm,
        )

        self.head_mu = tf.keras.Sequential(
            [
                Input(shape=(hidden_sizes[-1],)),
                BayesianDense(
                    hidden_sizes[-1], action_space.shape[0] * num_heads, num_heads=num_heads
                ),
            ]
        )
        self.head_log_std = tf.keras.Sequential(
            [
                Input(shape=(hidden_sizes[-1],)),
                BayesianDense(
                    hidden_sizes[-1], action_space.shape[0] * num_heads, num_heads=num_heads
                ),
            ]
        )
        self.action_space = action_space

    @property
    def common_variables(self) -> List[tf.Variable]:
        return (
            self.core.trainable_variables
            + self.head_mu.trainable_variables
            + self.head_log_std.trainable_variables
        )

    def call(
        self, x: tf.Tensor, samples_num: int = 1
    ) -> Tuple[tf.Tensor, tf.Tensor, tf.Tensor, tf.Tensor]:
        input_x = x
        full_obs = x
        if self.hide_task_id:
            input_x = input_x[:, :MW_OBS_LEN]
        mus, pis = [], []

        for sample_idx in range(samples_num):
            x = self.core(input_x)
            mu = self.head_mu(x)
            log_std = self.head_log_std(x)

            if self.num_heads > 1:
                mu = _choose_head(mu, full_obs, self.num_heads)
                log_std = _choose_head(log_std, full_obs, self.num_heads)

            log_std = tf.clip_by_value(log_std, LOG_STD_MIN, LOG_STD_MAX)
            std = tf.exp(log_std)
            pi = mu + tf.random.normal(tf.shape(input=mu)) * std
            logp_pi = gaussian_likelihood(pi, mu, log_std)

            mu, pi, logp_pi = apply_squashing_func(mu, pi, logp_pi)

            # Make sure actions are in correct range
            action_scale = self.action_space.high[0]
            mu *= action_scale
            pi *= action_scale

            mus += [mu]
            pis += [pi]

        mu = tf.reduce_mean(tf.stack(mus), 0)
        pi = tf.reduce_mean(tf.stack(pis), 0)

        return mu, log_std, pi, logp_pi


def kl_divergence(
    posterior_mean: tf.Tensor,
    posterior_logvar: tf.Tensor,
    prior_mean: tf.Tensor,
    prior_logvar: tf.Tensor,
) -> tf.Tensor:
    numel = tf.cast(tf.size(posterior_mean), tf.float32)
    const_term = -0.5 * numel
    log_std_diff = 0.5 * tf.reduce_sum(prior_logvar - posterior_logvar)

    posterior_var = tf.exp(posterior_logvar)
    prior_var = tf.exp(prior_logvar)

    mu_diff_term = 0.5 * tf.reduce_sum(
        (posterior_var + (posterior_mean - prior_mean) ** 2) / (prior_var)
    )
    kl = const_term + log_std_diff + mu_diff_term
    return kl
