# Supplementary material
Source: ML conference proceedings conference paper supplement (https://proceedings.neurips.cc/paper_files/paper/2022/hash/2938ad0434a6506b125d8adaff084a4a-Abstract.html)
Supplement: Supplementary file 1 [file 2938ad0434a6506b125d8adaff084a4a-Supplemental-Conference.zip › disentangling_transfer/code/continualworld/sac/utils/serialization_utils.py]

import json


def convert_json(obj):
    """Convert obj to a version which can be serialized with JSON."""
    if is_json_serializable(obj):
        return obj
    else:
        if isinstance(obj, dict):
            return {convert_json(k): convert_json(v) for k, v in obj.items()}

        elif isinstance(obj, tuple):
            return (convert_json(x) for x in obj)

        elif isinstance(obj, list):
            return [convert_json(x) for x in obj]

        elif hasattr(obj, "__name__") and not ("lambda" in obj.__name__):
            return convert_json(obj.__name__)

        elif hasattr(obj, "__dict__") and obj.__dict__:
            obj_dict = {convert_json(k): convert_json(v) for k, v in obj.__dict__.items()}
            return {str(obj): obj_dict}

        return str(obj)


def is_json_serializable(v):
    try:
        json.dumps(v)
        return True
    except:
        return False
