# Supplementary material
Source: ML conference proceedings conference paper supplement (https://proceedings.neurips.cc/paper_files/paper/2022/hash/2938ad0434a6506b125d8adaff084a4a-Abstract.html)
Supplement: Supplementary file 1 [file 2938ad0434a6506b125d8adaff084a4a-Supplemental-Conference.zip › disentangling_transfer/code/continualworld/tasks.py]

TASK_SEQS = {
    "CW10": [
        "hammer-v1",
        "push-wall-v1",
        "faucet-close-v1",
        "push-back-v1",
        "stick-pull-v1",
        "handle-press-side-v1",
        "push-v1",
        "shelf-place-v1",
        "window-close-v1",
        "peg-unplug-side-v1",
    ],
}

TASK_SEQS["CW20"] = TASK_SEQS["CW10"] + TASK_SEQS["CW10"]
