# Supplementary material
Source: ML conference proceedings conference paper supplement (https://proceedings.neurips.cc/paper_files/paper/2022/hash/2938ad0434a6506b125d8adaff084a4a-Abstract.html)
Supplement: Supplementary file 1 [file 2938ad0434a6506b125d8adaff084a4a-Supplemental-Conference.zip › disentangling_transfer/code/continualworld/utils/run_utils.py]

from typing import Type

from continualworld.methods.agem import AGEM_SAC
from continualworld.methods.episodic_replay import Episodic_SAC
from continualworld.methods.ewc import EWC_SAC
from continualworld.methods.l2 import L2_SAC
from continualworld.methods.mas import MAS_SAC
from continualworld.methods.packnet import PackNet_SAC
from continualworld.methods.vcl import VCL_SAC
from continualworld.sac.sac import SAC


def get_sac_class(cl_method: str) -> Type[SAC]:
    if cl_method is None:
        return SAC
    if cl_method == "l2":
        return L2_SAC
    if cl_method == "ewc":
        return EWC_SAC
    if cl_method == "mas":
        return MAS_SAC
    if cl_method == "vcl":
        return VCL_SAC
    if cl_method == "packnet":
        return PackNet_SAC
    if cl_method == "agem":
        return AGEM_SAC
    if cl_method == "episodic_replay":
        return Episodic_SAC
    assert False, "Bad cl_method!"
