# Supplementary material
Source: ML conference proceedings conference paper supplement (https://proceedings.neurips.cc/paper_files/paper/2022/hash/2938ad0434a6506b125d8adaff084a4a-Abstract.html)
Supplement: Supplementary file 1 [file 2938ad0434a6506b125d8adaff084a4a-Supplemental-Conference.zip › disentangling_transfer/code/input_args.py]

import argparse

from continualworld.tasks import TASK_SEQS
from continualworld.utils.enums import BufferType
from continualworld.utils.utils import float_or_str, sci2int, str2bool


def cl_parse_args(args=None):
    parser = argparse.ArgumentParser(description="Continual World")

    task_group = parser.add_mutually_exclusive_group()
    task_group.add_argument(
        "--tasks",
        type=str,
        choices=TASK_SEQS.keys(),
        default=None,
        help="Name of the sequence you want to run",
    )
    task_group.add_argument(
        "--task_list",
        nargs="+",
        default=None,
        help="List of tasks you want to run, by name or by the MetaWorld index",
    )
    parser.add_argument(
        "--logger_output",
        type=str,
        nargs="+",
        choices=["neptune", "tensorboard", "tsv"],
        default=["tsv"],
        help="Types of logger used.",
    )
    parser.add_argument(
        "--group_id",
        type=str,
        default="default_group",
        help="Group ID, for grouping logs from different experiments into common directory",
    )
    parser.add_argument("--seed", type=int, help="Seed for randomness")
    parser.add_argument(
        "--steps_per_task", type=sci2int, default=int(1e6), help="Numer of steps per task"
    )
    parser.add_argument(
        "--log_every",
        type=sci2int,
        default=int(2e4),
        help="Number of steps between subsequent evaluations and logging",
    )
    parser.add_argument(
        "--replay_size", type=sci2int, default=int(1e6), help="Size of the replay buffer"
    )
    parser.add_argument(
        "--batch_size", type=int, default=128, help="Minibatch size for the optimization"
    )
    parser.add_argument(
        "--hidden_sizes",
        type=int,
        nargs="+",
        default=[256, 256, 256, 256],
        help="Hidden sizes list for the MLP models",
    )
    parser.add_argument(
        "--buffer_type",
        type=str,
        default="fifo",
        choices=[b.value for b in BufferType],
        help="Strategy of inserting examples into the buffer",
    )
    parser.add_argument(
        "--reset_buffer_on_task_change",
        type=str2bool,
        default=True,
        help="If true, replay buffer is reset on each task change",
    )
    parser.add_argument(
        "--reset_optimizer_on_task_change",
        type=str2bool,
        default=True,
        help="If true, optimizer is reset on each task change",
    )
    parser.add_argument(
        "--reset_actor_on_task_change",
        type=str2bool,
        default=False,
        help="If true, actor model is reset on each task change",
    )
    parser.add_argument(
        "--reset_critic_on_task_change",
        type=str2bool,
        default=False,
        help="If true, critic model is reset on each task change",
    )
    parser.add_argument(
        "--activation", type=str, default="lrelu", help="Activation kind for the models"
    )
    parser.add_argument(
        "--use_layer_norm",
        type=str2bool,
        default=True,
        help="Whether or not use layer normalization",
    )
    parser.add_argument("--lr", type=float, default=1e-3, help="Learning rate for the optimizer")
    parser.add_argument("--gamma", type=float, default=0.99, help="Discount factor")
    parser.add_argument(
        "--alpha",
        default="auto",
        help="Entropy regularization coefficient. "
        "Can be either float value, or 'auto', in which case it is dynamically tuned.",
    )
    parser.add_argument(
        "--target_output_std",
        type=float,
        default=0.089,
        help="If alpha is 'auto', alpha is dynamically tuned so that standard deviation "
        "of the action distribution on every dimension matches target_output_std.",
    )
    parser.add_argument(
        "--cl_method",
        type=str,
        choices=[None, "l2", "ewc", "mas", "vcl", "packnet", "agem", "episodic_replay"],
        default=None,
        help="If None, finetuning method will be used. If one of 'l2', 'ewc', 'mas', 'vcl',"
        "'packnet', 'agem', respective method will be used.",
    )
    parser.add_argument(
        "--packnet_retrain_steps",
        type=int,
        default=0,
        help="Number of retrain steps after network pruning, which occurs after each task",
    )
    parser.add_argument(
        "--regularize_critic",
        type=str2bool,
        default=False,
        help="If True, both actor and critic are regularized; if False, only actor is",
    )
    parser.add_argument(
        "--cl_reg_coef",
        type=float,
        default=0.0,
        help="Regularization strength for continual learning methods. "
        "Valid for 'l2', 'ewc', 'mas' continual learning methods.",
    )
    parser.add_argument(
        "--vcl_first_task_kl",
        type=str2bool,
        default=False,
        help="If True, use KL regularization also for the first task in 'vcl' continual learning"
        "method.",
    )
    parser.add_argument(
        "--episodic_mem_per_task",
        type=int,
        default=0,
        help="Number of examples to keep in additional memory per task. Valid for 'agem' continual"
        "learning method.",
    )
    parser.add_argument(
        "--episodic_batch_size",
        type=int,
        default=0,
        help="Minibatch size to compute additional loss in 'agem' continual learning method.",
    )
    parser.add_argument(
        "--multihead_archs", type=str2bool, default=True, help="Whether use multi-head architecture"
    )
    parser.add_argument(
        "--hide_task_id",
        type=str2bool,
        default=True,
        help="if True, one-hot encoding of the task will not be appended to observation",
    )
    parser.add_argument("--clipnorm", type=float, default=None, help="Value for gradient clipping")

    parser.add_argument(
        "--episodic_memory_from_buffer",
        type=str2bool,
        default=True,
    )

    parser.add_argument(
        "--start_steps",
        type=int,
        default=10_000,
    )
    parser.add_argument(
        "--exploration_kind",
        type=str,
        default=None,
        help="Kind of exploration to use at the beginning of a new task.",
    )
    parser.add_argument(
        "--upload_weights",
        type=str2bool,
        help="Upload weights to neptune",
        default=False,
    )
    parser.add_argument(
        "--freeze_actor_on_task_change",
        type=str, default=None,
        choices=["core", "all"],
    )
    parser.add_argument(
        "--freeze_critic_on_task_change",
        type=str, default=None,
    )
    parser.add_argument(
        "--transfer_alpha_on_task_change",
        type=str2bool,
        help="Transfer the alpha on task change",
        default=False,
    )

    return parser.parse_args(args=args)


def mt_parse_args(args=None):
    parser = argparse.ArgumentParser(description="Continual World")
    task_group = parser.add_mutually_exclusive_group()
    task_group.add_argument(
        "--tasks",
        type=str,
        choices=TASK_SEQS.keys(),
        default=None,
        help="Name of the sequence you want to run",
    )
    task_group.add_argument(
        "--task_list",
        nargs="+",
        default=None,
        help="List of tasks you want to run, by name or by the MetaWorld index",
    )
    parser.add_argument(
        "--logger_output",
        type=str,
        nargs="+",
        choices=["neptune", "tensorboard", "tsv"],
        default=["tsv"],
        help="Types of logger used.",
    )
    parser.add_argument(
        "--group_id",
        type=str,
        default="default_group",
        help="Group ID, for grouping logs from different experiments into common directory",
    )
    parser.add_argument("--seed", type=int, help="Seed for randomness")
    parser.add_argument(
        "--steps_per_task", type=sci2int, default=int(1e6), help="Numer of steps per task"
    )
    parser.add_argument(
        "--log_every",
        type=sci2int,
        default=int(2e4),
        help="Number of steps between subsequent evaluations and logging",
    )
    parser.add_argument(
        "--replay_size", type=sci2int, default=int(1e6), help="Size of the replay buffer"
    )
    parser.add_argument(
        "--batch_size", type=int, default=128, help="Minibatch size for the optimization"
    )
    parser.add_argument(
        "--hidden_sizes",
        type=int,
        nargs="+",
        default=[256, 256, 256, 256],
        help="Hidden sizes list for the MLP models",
    )
    parser.add_argument(
        "--activation", type=str, default="lrelu", help="Activation kind for the models"
    )
    parser.add_argument(
        "--use_layer_norm",
        type=str2bool,
        default=True,
        help="Whether or not use layer normalization",
    )
    parser.add_argument("--lr", type=float, default=1e-4, help="Learning rate for the optimizer")
    parser.add_argument("--gamma", type=float, default=0.99, help="Discount factor")
    parser.add_argument(
        "--alpha",
        default="auto",
        help="Entropy regularization coefficient. "
        "Can be either float value, or 'auto', in which case it is dynamically tuned.",
    )
    parser.add_argument(
        "--target_output_std",
        type=float,
        default=0.089,
        help="If alpha is 'auto', alpha is dynamically tuned so that standard deviation "
        "of the action distribution on every dimension matches target_output_std.",
    )
    parser.add_argument(
        "--use_popart", type=str2bool, default=True, help="Whether use PopArt normalization"
    )
    parser.add_argument(
        "--popart_beta",
        type=float,
        default=3e-4,
        help="Beta parameter for updating statistics in PopArt",
    )
    parser.add_argument(
        "--multihead_archs", type=str2bool, default=True, help="Whether use multi-head architecture"
    )
    parser.add_argument(
        "--hide_task_id",
        type=str2bool,
        default=True,
        help="if True, one-hot encoding of the task will not be appended to observation",
    )
    return parser.parse_args(args=args)


def single_parse_args(args=None):
    parser = argparse.ArgumentParser(description="Run single task")
    parser.add_argument("--task", type=str, help="Name of the task")
    parser.add_argument(
        "--logger_output",
        type=str,
        nargs="+",
        choices=["neptune", "tensorboard", "tsv"],
        default=["tsv"],
        help="Types of logger used.",
    )
    parser.add_argument(
        "--group_id",
        type=str,
        default="default_group",
        help="Group ID, for grouping logs from different experiments into common directory",
    )
    parser.add_argument("--seed", type=int, default=0, help="Seed for randomness")
    parser.add_argument(
        "--steps", type=sci2int, default=int(1e6), help="Number of steps the algorithm will run for"
    )
    parser.add_argument(
        "--log_every",
        type=sci2int,
        default=int(2e4),
        help="Number of steps between subsequent evaluations and logging",
    )
    parser.add_argument(
        "--replay_size", type=sci2int, default=int(1e6), help="Size of the replay buffer"
    )
    parser.add_argument(
        "--batch_size", type=int, default=128, help="Minibatch size for the optimization"
    )
    parser.add_argument(
        "--hidden_sizes",
        type=int,
        nargs="+",
        default=[256, 256, 256, 256],
        help="Hidden sizes list for the MLP models",
    )
    parser.add_argument(
        "--activation", type=str, default="lrelu", help="Activation kind for the models"
    )
    parser.add_argument(
        "--use_layer_norm",
        type=str2bool,
        default=True,
        help="Whether or not use layer normalization",
    )
    parser.add_argument("--lr", type=float, default=1e-3, help="Learning rate for the optimizer")
    parser.add_argument("--gamma", type=float, default=0.99, help="Discount factor")
    parser.add_argument(
        "--alpha",
        type=float_or_str,
        default="auto",
        help="Entropy regularization coefficient. "
        "Can be either float value, or 'auto', in which case it is dynamically tuned.",
    )
    parser.add_argument(
        "--target_output_std",
        type=float,
        default=0.089,
        help="If alpha is 'auto', alpha is dynamically tuned so that standard deviation "
        "of the action distribution on every dimension matches target_output_std.",
    )
    return parser.parse_args(args=args)
