# Supplementary material
Source: ML conference proceedings conference paper supplement (https://proceedings.neurips.cc/paper_files/paper/2022/hash/2938ad0434a6506b125d8adaff084a4a-Abstract.html)
Supplement: Supplementary file 1 [file 2938ad0434a6506b125d8adaff084a4a-Supplemental-Conference.zip › disentangling_transfer/code/mrunner_run.py]

from mrunner.helpers.client_helper import get_configuration
import mrunner
mrunner.settings.NEPTUNE_USE_NEW_API = True

from continualworld.envs import get_task_name
from continualworld.sac.utils.logx import EpochLogger
from run_cl import main as cl_main
from run_mt import main as mt_main
from run_single import main as single_main

MAIN_DICT = {"cl": cl_main, "mt": mt_main, "single": single_main}

if __name__ == "__main__":
    config = get_configuration(print_diagnostics=True, with_neptune=True)
    group_id = config.pop("group_id")
    logger = EpochLogger(
        config.pop("logger_output"), config=config, group_id=group_id, with_mrunner=True
    )

    del config["experiment_id"]
    run_kind = config.pop("run_kind")

    if run_kind == "single":
        config["task"] = get_task_name(config["task"])

    main = MAIN_DICT[run_kind]
    main(logger, **config)
