# Supplementary material
Source: ML conference proceedings conference paper supplement (https://proceedings.neurips.cc/paper_files/paper/2022/hash/2938ad0434a6506b125d8adaff084a4a-Abstract.html)
Supplement: Supplementary file 1 [file 2938ad0434a6506b125d8adaff084a4a-Supplemental-Conference.zip › disentangling_transfer/code/mrunner_utils.py]

from input_args import cl_parse_args, mt_parse_args, single_parse_args

PARSE_ARGS_DICT = {"cl": cl_parse_args, "mt": mt_parse_args, "single": single_parse_args}


def combine_config_with_defaults(config):
    run_kind = config["run_kind"]
    res = vars(PARSE_ARGS_DICT[run_kind]([]))  # get defaults
    res.update(config)
    return res
