# Supplementary material
Source: ML conference proceedings conference paper supplement (https://proceedings.neurips.cc/paper_files/paper/2022/hash/2938ad0434a6506b125d8adaff084a4a-Abstract.html)
Supplement: Supplementary file 1 [file 2938ad0434a6506b125d8adaff084a4a-Supplemental-Conference.zip › disentangling_transfer/code/nb_produce_results.ipynb]

# %% [code]
from continualworld.results_processing.utils import get_data_for_runs, METHODS_ORDER
from continualworld.results_processing.tables import calculate_metrics
from continualworld.results_processing.plots import visualize_sequence

# %% [code]
# Replace with your own directories

cl_logs = 'examples/logs/cl'
mtl_logs = 'examples/logs/mtl'
baseline_logs = 'examples/logs/baseline'

# %% [code]
cl_data = get_data_for_runs(cl_logs, kind="cl")
mtl_data = get_data_for_runs(mtl_logs, kind="mtl")
baseline_data = get_data_for_runs(baseline_logs, kind="single")

# %% [code]
table = calculate_metrics(cl_data, mtl_data, baseline_data,
                          methods_order=METHODS_ORDER)
table

# %% [code]
visualize_sequence(
    cl_data,
    mtl_data,
    baseline_data,
    group_by=['cl_method'],
    show_avg=True,
    show_current=True,
    show_individual=True,
    show_ft=True,
    order=('cl_method', METHODS_ORDER),
    smoothen=False,
    use_ci=False  # set True to show confidence intervals in all plots, will be slower though
)
