# Supplementary material
Source: ML conference proceedings conference paper supplement (https://proceedings.neurips.cc/paper_files/paper/2022/hash/2938ad0434a6506b125d8adaff084a4a-Abstract.html)
Supplement: Supplementary file 1 [file 2938ad0434a6506b125d8adaff084a4a-Supplemental-Conference.zip › disentangling_transfer/code/setup.py]

from setuptools import find_packages, setup

# Required dependencies
required = [
    "tensorflow>=2.0",
    "mujoco-py<2.1,>=2.0",
    "metaworld @ git+https://github.com/rlworkgroup/metaworld.git@0875192baaa91c43523708f55866d98eaf3facaf#egg=metaworld",
    "pandas",
    "matplotlib",
    "seaborn",
]

setup(
    name="continualworld",
    description="Continual World: A Robotic Benchmark For Continual Reinforcement Learning",
    packages=find_packages(),
    include_package_data=True,
    install_requires=required,
)
